# Supplementary material
Source: bioRxiv or medRxiv preprint supplement (https://www.biorxiv.org/highwire/filestream/131784/field_highwire_adjunct_files/3/361105-4.pdf)
Supplement: Supplementary file [file 361105-4.pdf]

## **Body/Overlap Zone/Ventral Groove**

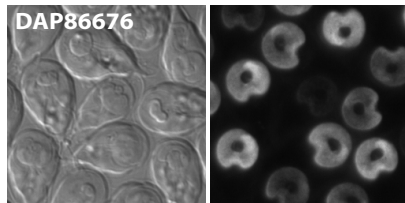

**delta-giardin (SF assemblin)**

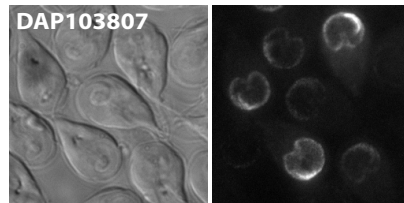

**ankyrin repeat**

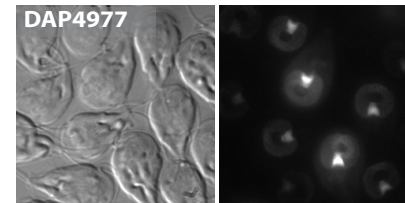

**Nek kinase**

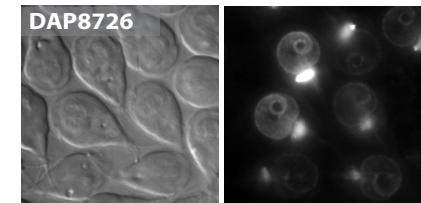

**novel**

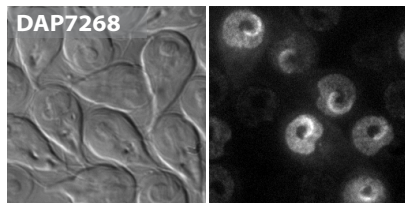

**ankyrin repeat**

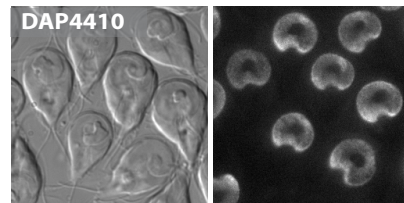

**SALP-1 (SF assemblin)**

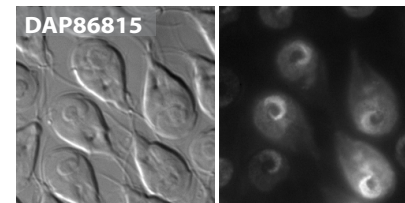

**novel**

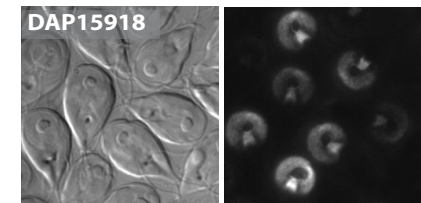

**novel**

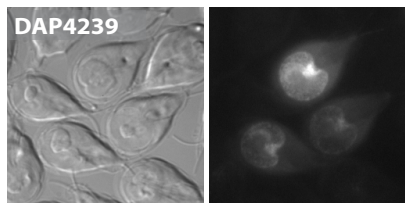

**novel**

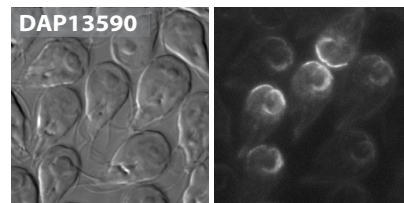

**ankyrin repeat**

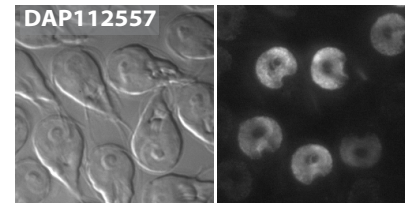

**ankyrin repeat**

## **Body**

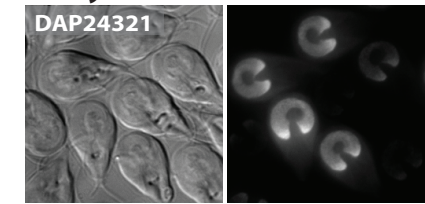

**Nek kinase**

## **Body/Overlap Zone**

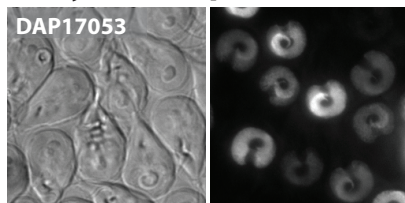

**ankyrin repeat**

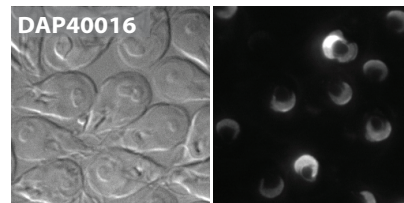

**ankyrin repeat**

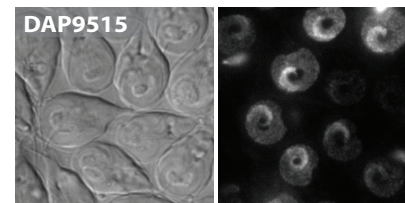

**ankyrin repeat**

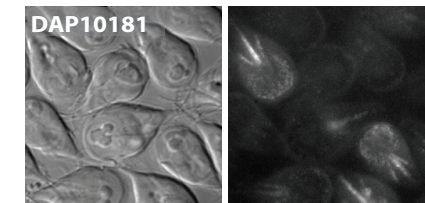

**novel**

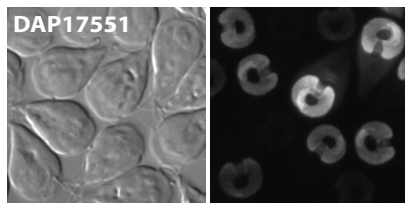

**ankyrin repeat**

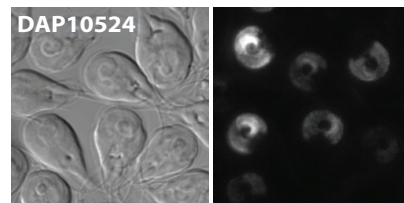

**novel**

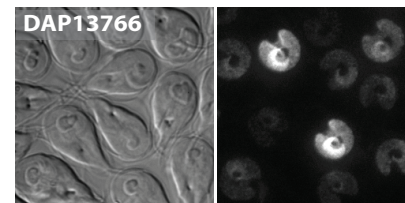

**ankyrin repeat**

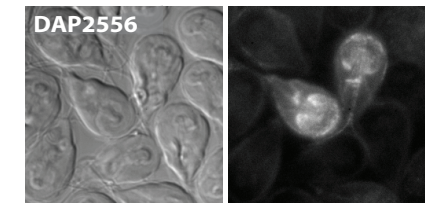

**novel**

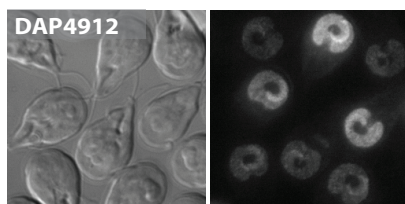

**Nek kinase**

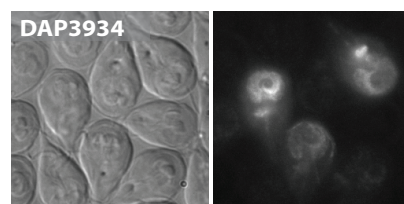

**novel**

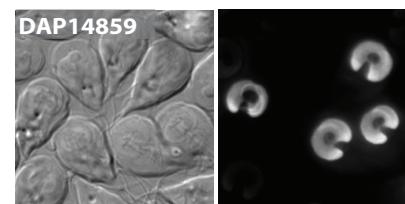

**ankyrin repeat**

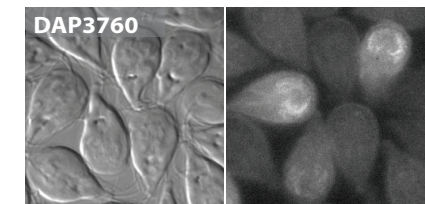

**ankyrin repeat**
